# Supplementary material for: Training Signaling Pathway Maps to Biochemical Data with Constrained Fuzzy Logic: Quantitative Analysis of Liver Cell Responses to Inflammatory Stimuli
Source: PubMed Central journal article supplement (PMC3048376; doi:10.1371/journal.pcbi.1001099), 2011-03-03

# Ligand Stimulation

Cytokine's Release

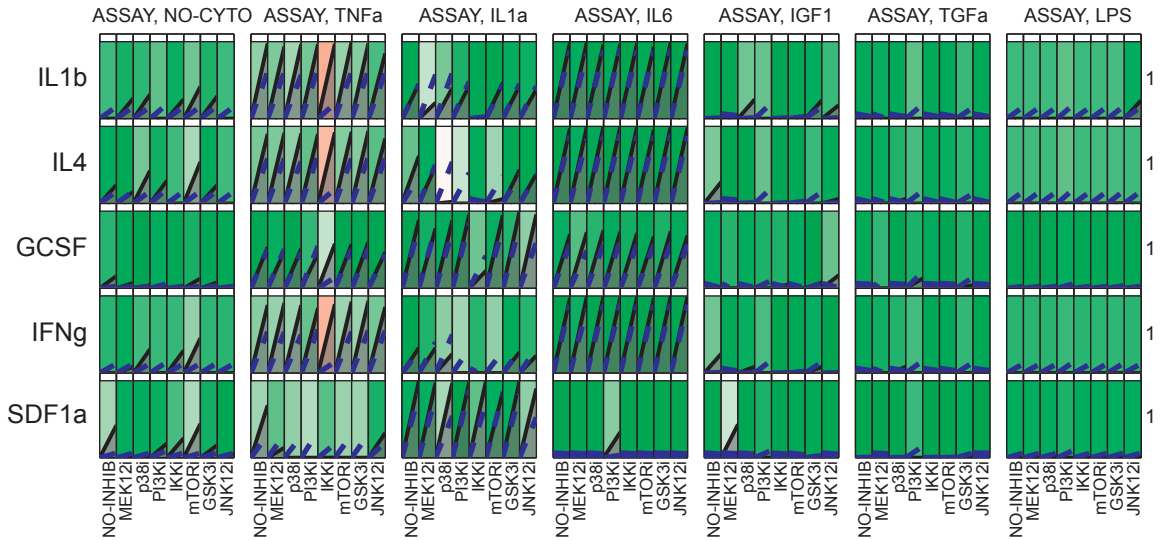

# Inhibitor

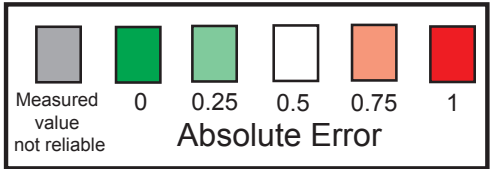

Supplement: pcbi.1001099.s010.pdf [file pcbi.1001099.s010.pdf]
