# Supplementary material for: Training Signaling Pathway Maps to Biochemical Data with Constrained Fuzzy Logic: Quantitative Analysis of Liver Cell Responses to Inflammatory Stimuli
Source: PubMed Central journal article supplement (PMC3048376; doi:10.1371/journal.pcbi.1001099), 2011-03-03
Supplement: pcbi.1001099.s015.pdf [file pcbi.1001099.s015.pdf]

| <b>Randomization Method</b>         | <b>Average P-Value</b> | <b>Maximum P-Value</b> |
|-------------------------------------|------------------------|------------------------|
| Randomize Data<br>n = 312           | $9.6 \times 10^{-68}$  | $1.8 \times 10^{-65}$  |
| Swap Heads<br>n = 1027              | $< 1.0 \times 10^{-3}$ | $< 1.0 \times 10^{-3}$ |
| Swap Tails<br>n = 1059              | $< 1.0 \times 10^{-3}$ | $< 1.0 \times 10^{-3}$ |
| Swap Inputs<br>n = 1016             | $< 1.0 \times 10^{-3}$ | $< 1.0 \times 10^{-3}$ |
| Completely Random Model<br>n = 1104 | $< 1.0 \times 10^{-3}$ | $< 1.0 \times 10^{-3}$ |
