# Supplementary material for: Training Signaling Pathway Maps to Biochemical Data with Constrained Fuzzy Logic: Quantitative Analysis of Liver Cell Responses to Inflammatory Stimuli
Source: PubMed Central journal article supplement (PMC3048376; doi:10.1371/journal.pcbi.1001099), 2011-03-03
Supplement: pcbi.1001099.s016.pdf [file pcbi.1001099.s016.pdf]

|    | <b>Stimulation condition</b> | <b>Measured signal left out</b> |
|----|------------------------------|---------------------------------|
| 1  | IGF1                         | GSK3                            |
| 2  | TGF $\alpha$                 | GSK3                            |
| 3  | IGF1                         | Akt                             |
| 4  | TGF $\alpha$                 | Akt                             |
| 5  | TNF $\alpha$                 | p53                             |
| 6  | IL1 $\alpha$                 | p53                             |
| 7  | TNF $\alpha$                 | I $\kappa$ B                    |
| 8  | IL1 $\alpha$                 | I $\kappa$ B                    |
| 9  | TGF $\alpha$                 | CREB                            |
| 10 | IL1 $\alpha$                 | CREB                            |
| 11 | TGF $\alpha$                 | p90RSK                          |
| 12 | IL1 $\alpha$                 | p90RSK                          |
| 13 | TGF $\alpha$                 | Mek                             |
| 14 | IL1 $\alpha$                 | Mek                             |
| 15 | TGF $\alpha$                 | IRS1s                           |
| 16 | IL1 $\alpha$                 | IRS1s                           |
| 17 | TGF $\alpha$                 | p70s6                           |
| 18 | IL1 $\alpha$                 | p70s6                           |
| 19 | IGF1                         | p70s6                           |
