# Supplementary material for: Training Signaling Pathway Maps to Biochemical Data with Constrained Fuzzy Logic: Quantitative Analysis of Liver Cell Responses to Inflammatory Stimuli
Source: PubMed Central journal article supplement (PMC3048376; doi:10.1371/journal.pcbi.1001099), 2011-03-03
Supplement: pcbi.1001099.s017.pdf [file pcbi.1001099.s017.pdf]

| <b>Unprocessed Models</b> |             |            |              |             |              |
|---------------------------|-------------|------------|--------------|-------------|--------------|
| <b>Input/Output</b>       | <b>IL1B</b> | <b>IL4</b> | <b>G-CSF</b> | <b>IFNg</b> | <b>SDF1a</b> |
| <b>MEK1/2</b>             | 0.26        | 0.29       | 0.29         | 0.32        | 0.39         |
| <b>IkB</b>                | 0.84        | 0.90       | 0.61         | 0.77        | 0.10         |
| <b>STAT3</b>              | 1.00        | 1.00       | 0.94         | 1.00        | 0            |
| <b>GSK3</b>               | 0.29        | 0.29       | 0.16         | 0.39        | 0.52         |
| <b>CREB</b>               | 0.26        | 0.19       | 0.23         | 0.16        | 0.29         |
| <b>c-Jun</b>              | 0.48        | 0.55       | 0.58         | 0.58        | 0.64         |
| <b>Hsp27</b>              | 0.58        | 0.65       | 0.71         | 0.45        | 0.74         |
| <b>Filtered Models</b>    |             |            |              |             |              |
| <b>Input/Output</b>       | <b>IL1B</b> | <b>IL4</b> | <b>G-CSF</b> | <b>IFNg</b> | <b>SDF1a</b> |
| <b>MEK1/2</b>             | 0.19        | 0.19       | 0.19         | 0.26        | 0.32         |
| <b>IkB</b>                | 0.84        | 0.87       | 0.61         | 0.74        | 0.10         |
| <b>STAT3</b>              | 1.00        | 1.00       | 0.94         | 1.00        | 0            |
| <b>GSK3</b>               | 0.26        | 0.13       | 0.13         | 0.29        | 0.39         |
| <b>CREB</b>               | 0.19        | 0.13       | 0.19         | 0.06        | 0.26         |
| <b>c-Jun</b>              | 0.42        | 0.45       | 0.52         | 0.48        | 0.52         |
| <b>Hsp27</b>              | 0.55        | 0.52       | 0.61         | 0.39        | 0.71         |
