# Supplementary material for: Training Signaling Pathway Maps to Biochemical Data with Constrained Fuzzy Logic: Quantitative Analysis of Liver Cell Responses to Inflammatory Stimuli
Source: PubMed Central journal article supplement (PMC3048376; doi:10.1371/journal.pcbi.1001099), 2011-03-03
Supplement: pcbi.1001099.s018.pdf [file pcbi.1001099.s018.pdf]

| Gene                                                                                                                                                                                                                                                                                                                                                                                                                                                                                            | Transcription Factor Binding Site                                                                                                                  |
|-------------------------------------------------------------------------------------------------------------------------------------------------------------------------------------------------------------------------------------------------------------------------------------------------------------------------------------------------------------------------------------------------------------------------------------------------------------------------------------------------|----------------------------------------------------------------------------------------------------------------------------------------------------|
| IL4                                                                                                                                                                                                                                                                                                                                                                                                                                                                                             | IRF1 <sup>*+</sup><br>IRF2 <sup>*</sup>                                                                                                            |
| IL1B                                                                                                                                                                                                                                                                                                                                                                                                                                                                                            | NFκB <sup>+</sup><br>CREB <sup>*</sup><br>C/EBPB <sup>*</sup><br>STAT1 <sup>*¥</sup>                                                               |
| G-CSF                                                                                                                                                                                                                                                                                                                                                                                                                                                                                           | KFκB <sup>*+</sup><br>C/EBPα <sup>*  </sup><br>C/EBPB <sup>*</sup><br>TAL1α/E47 <sup>+§</sup>                                                      |
| SDF1α                                                                                                                                                                                                                                                                                                                                                                                                                                                                                           | STAT <sup>+</sup><br>TAL1α/E47 <sup>+§</sup><br>c-Jun <sup>#</sup><br>STAT1 <sup>#¥</sup>                                                          |
| IFNγ                                                                                                                                                                                                                                                                                                                                                                                                                                                                                            | IRF1 <sup>+</sup><br>IRF2 <sup>+</sup><br>STAT3 <sup>*</sup><br>NFκB <sup>*</sup><br>CREB <sup>*</sup><br>c-Jun <sup>*</sup>                       |
| IL6                                                                                                                                                                                                                                                                                                                                                                                                                                                                                             | NFκB <sup>*</sup><br>AP-1 <sup>*</sup><br>c-Jun <sup>*</sup><br>C/EBPB <sup>*</sup><br>CREB <sup>+</sup><br>IRF1 <sup>+</sup><br>IRF2 <sup>+</sup> |
| IRF1                                                                                                                                                                                                                                                                                                                                                                                                                                                                                            | STAT <sup>+*</sup><br>AP-1 <sup>+</sup><br>NFκB <sup>*</sup>                                                                                       |
| IRF2                                                                                                                                                                                                                                                                                                                                                                                                                                                                                            | CREB <sup>+</sup><br>IRF1 <sup>*</sup>                                                                                                             |
| <p>* denotes transcription factor binding site (BioBase TRANSFAC)<br/> # denotes transcription factor binding site in the vicinity of the gene (BioBase TRANSFAC)<br/> + denotes site computationally predicted (UCSC Genome Bioinformatics)<br/> ¥ STAT1 and STAT3 have similar binding motifs (BioBase TRANSFAC)<br/>    C/EBPα is phosphorylated by GSK3 [1]<br/> § TAL1α is phosphorylated by Erk1 [2] and Akt [3] (REF). Phosphorylation by Akt inhibits TAL1α repressor activity [3].</p> |                                                                                                                                                    |

## References

1. Ross S, Erickson R, Hemati N, MacDougald O (1999) Glycogen synthase kinase 3 is an insulin-regulated C/EBPα kinase. *Mol Cell Biol* 19: 8433-8441.
2. Cheng J, Cobb M, Baer R (1993) Phosphorylation of the TAL1 oncoprotein by the extracellular-signal-regulated protein kinase ERK1. *Mol Cell Biol* 13: 801-808.
3. Palamarchuk A, Efanov A, Maximov V, Aquilan R, Croce C, et al. (2005) Akt phosphorylates Tal1 oncoprotein and inhibits its repressor activity. *Cancer Res* 65: 4515-4519.
