# Supplementary material for: Training Signaling Pathway Maps to Biochemical Data with Constrained Fuzzy Logic: Quantitative Analysis of Liver Cell Responses to Inflammatory Stimuli
Source: PLOS journal article supplement (doi:10.1371/journal.pcbi.1001099), 2011-03-03
Supplement: S19 (10.1371/journal.pcbi.1001099.s019) [file journal.pcbi.1001099.s019]

301 Moved Permanently

# Moved Permanently

The document has moved here.

---

Apache Server at www.ploscompbiol.org Port 80
